# Supplementary material
Source: HighWire-hosted journal article supplement (https://cmaj.ca/highwire/filestream/57730/field_highwire_adjunct_files/1/work-stiell-2-at.pdf)
Supplement: work-stiell-2-at.pdf [file work-stiell-2-at.pdf]

## Appendix 2 (as submitted by the authors)

| <b>Computed Tomography Rates of the 4,531 Head Injury Study Patients According to Hospital Type</b> |                    |       |           |       |                               |
|-----------------------------------------------------------------------------------------------------|--------------------|-------|-----------|-------|-------------------------------|
|                                                                                                     | Number of Patients |       | % Imaging |       | % Absolute Change<br>(95% CI) |
|                                                                                                     | Before             | After | Before    | After |                               |
| <b>Hospital Type</b>                                                                                |                    |       |           |       |                               |
| Community - Intervention                                                                            | 411                | 619   | 62.0      | 83.2  | +21.2 (15.5-26.8)             |
| Teaching - Intervention                                                                             | 638                | 912   | 63.3      | 71.4  | +8.1 (3.2-12.9 )              |
| Community - Control                                                                                 | 236                | 291   | 40.7      | 53.3  | +12.6 (3.9-21.3)              |
| Teaching - Control                                                                                  | 640                | 784   | 77.3      | 81.9  | +4.5 (2.5-8.8)                |

**Appendix to:** Stiell IG, Clement CM, Grimshaw JM. A prospective cluster-randomized trial to implement the Canadian CT Head Rule in emergency departments. *CMAJ* 2010. DOI:10.1503/cmaj.091794.
